# Supplementary material for: Addressing social inequality in breastfeeding through proactive support: A realist evaluation from Denmark
Source: Research Square preprint supplement (doi:10.21203/rs.3.rs-7486070/v1), 2025-09-18
Supplement: Supplementary file 1 [file aad41adf0e317a39117ad057.docx]

**Focus group – interview guide**

| **Breastfeeding – a good start together**  **Presentation:**   - AKG, HKR, SFV   **Practical information:**   - 2 hours, we might use it all or end before - Informed consent where we ask for permission to record the interview - Confidentiality   **Format:**   - Have you participated in a focus group before? - We have some questions about your experiences with the intervention. We will be using questions, cases and claims. If we claim something and you disagree, please let us know. We very much welcome a debate. - We would like you to talk and discuss the questions together – you are welcome to ask each other questions along the way. - It is your experiences and thoughts we are interested in – and it is perfectly fine if you have a different viewpoint than your colleagues. No right or wrong. - Examples from your everyday work are more than welcome. We guarantee full confidentiality. - We evaluate the intervention – we did not develop or implement it! Do not be afraid to hurt our feelings – we welcome your unreserved opinion.   Question before we dive in?  *Remark: IPT = initial program theory (part of the realist methodology, see Methods in the paper)* | |
| --- | --- |
| **THEMATICAL DIMENSION** | **INTERVIEW QUESTION** |
| Presentations | - Please provide us with your name, years of experience, IBCLC certification and whether you participated in the training. |
| Professional identity | - Here is a scale ranging from not important to very important. Imagine that you must arrange your work tasks on this continuum. How important is breastfeeding counselling in your daily work as a health visitor? - Tell me more, which work tasks would you assign as Very important? What are your key tasks? |
| Getting the conversation going  Outcomes | - What is your overall impression of working with the intervention? - Try to describe the intervention? What is it all about? - In your opinion has the intervention had an effect here? In what way? - Have you experienced that your way of delivering breastfeeding counselling has changed within the last year? In what way? |
| The need for the intervention  Context  Differential outcomes  Context | - In your experience, is there a need for an intervention like this one in your municipality? - Try to describe the families where you typically encounter breastfeeding difficulties. - What are your experiences with families of young age and/or low educational attainment? - **IPT*:** We have this idea that families of young age and/or with low educational attainment usually do well with initiating breastfeeding, because they do not over-think it and complicate it, but when they perhaps later experience breastfeeding difficulties then they are faster to opt out of breastfeeding. What do you think about that? Does it match your experiences? - Try to describe the families who you experience benefit from the intervention. - Can you say anything about the families for whom the intervention is not working well? What is at stake in these families? |
| **Intensified intervention: proactive telephone calls**  CMO – context  Professioal identity  Mechanisms  Rival theories | - What are your experiences of the proactive telephone calls? - Tell me about the families where the telephone calls have worked well. - In your experience, do the telephone calls add something in relation to prevent breastfeeding challenges? In what way? - How has it been for you to be the proactive one? - What is the difference between saying “*just call me if you have any questions or experience breastfeeding issues*” vs. calling them to ask how it is going. - What about those families where there are no breastfeeding issues, how do the calls work here? Do you talk about something else than breastfeeding? Are the calls time consuming? - How do you feel about families asking questions about all other things than breastfeeding? - Does the call help you catch breastfeeding issues earlier? I am asking because we have talked to families who say that they do not want to trouble you and be an annoyance, so they do not reach out unless it is grave, but with the calls they say that it is easier for them to reach out. Does this match your experiences? Why do you think it makes a difference that you are the one who reach out? - Many families express that it is like the distance to you has been reduced. You seem closer and more accessible. What do you think about that? - What does it require for the calls to work? (a lot of time and flexibility, knowledge of the family, etc.) - **IPT:** if families who are at an increased risk of early breastfeeding cessation receive extra support from their health visitor via proactive telephone calls, then potential breastfeeding challenges can be addressed earlier, because… Because why? Help us refine the statement. Is it due to trust? Rapport? - **IPT:** if the health visitor is proactive and offer regular telephone support, then the families will be more likely to reach out when they have issues, because they do not feel that they are an annoyance because the increased contact where the health visitor just “checks in” makes them feel like it is okay to reach out even with smaller issues. True? - **IPT:** if the health visitor is proactive, then it becomes more natural for the families to reach out when they have issues, because the relationship is more equal (they both call each other), communication is both ways, and the health visitor leads the way by offering proactive calls. - **IPT:** if the health visitor is proactive, then the families will be more willing to share their worries and concerns without fearing to be judged as bad parents. It takes more courage to be the parent who actively contacts the health visitor and exposes your vulnerability when in doubt. It is easier and less is at stake when you just ask a question when she calls you. - Some of your colleagues have worried that the extra telephone support would make the families more insecure. That it signals “*we expect you to have problems, so therefore we call you all the time*”. Does this match your experiences? - Have you experienced that some families feel like the calls are almost like a form of control? - Have you noticed whether the calls help postpone the introduction of solids? |
| **Establishing rapport and a relation** | - CASE: you visit a family and they have started supplementing without consulting you. What do you do? - In your experiences, do families often reach out to you when they consider opting out of breastfeeding? Do you experience a difference before and after this intervention? - During observations of home visits, I noticed that a lot of families had opted out without consulting you. How come? Why do you think families do not reach out? (maybe it is not considered to be a big deal? Are they afraid of disappointing you? Feeling judged? Guilt? Breastfeeding pressure? What is going on here?) - What can you do to get families to reach out more? - Before this intervention was developed, a needs assessment was conducted. It showed that especially mothers of young age and/or with low educational attainment experienced health visitors talking past them. The mothers would then tell the health visitors what they wanted to hear. What do you think about that? - **IPT:** we have this idea, that the intervention functions through an improved relationship between you and the family. What do you think about that? Remember this from the training? Is it something you have worked with here? The rapport and the relation. |

| Wrap up | - What are you taking with you from the intervention in your future work? - Any final remarks or questions?   *Thank you very much for your time and contributions!* |
| --- | --- |
