# Supplementary material for: Addressing social inequality in breastfeeding through proactive support: A realist evaluation from Denmark
Source: Research Square preprint supplement (doi:10.21203/rs.3.rs-7486070/v1), 2025-09-18
Supplement: Supplementary file 2 [file e47500204a1af538e497a633.docx]

**Appendix 1. Completed COREQ checklist**

| **Domain 1: research team and reflexivity** | | |
| --- | --- | --- |
| **Personal characteristics** | | |
| 1. Interviewer/facilitator | Which author(s) conducted the interview or focus group? | AKG completed the interviews with mothers. AKG facilitated the focus groups with health visitors while HKR and SFV were moderators. |
| 2. Credentials | What were the researcher’s credentials? (e.g. PhD, MD) | AKG, PhD student SFV, PhD, assistant professor  HKR, PhD student (at the time of the focus group), currently postdoc |
| 3. Occupation | What was their occupation at the time of the study? | AKG and HKR were PhD students  SFV, assistant professor |
| 4. Gender | Was the researcher male or female? | AKG, SFV, HKR are female |
| 5. Experience and training | What experience or training did the researcher have? | AKG and HKR had both undertaken training in qualitative research methodologies and had previous experiences of this methodology. SFV has extensive experience with public health research. |
| **Relationship with participants** | | |
| 6. Relationship established | Was a relationship established prior to study commencement? | No prior relationship was established between the researchers and participants |
| 7. Participant knowledge of the interviewer | What did the participants know about the researcher? (e.g. personal goals, reasons for doing the research) | Participants knew where the researchers worked and the purpose of the research |
| 8. Interviewer characteristics | What characteristics were reported about the interviewer/facilitator? (e.g. bias, assumptions, reasons and interests in the research topic) | The three researchers had personal (positive and negative) experiences with breastfeeding. |
| **Domain 2: study design** | | |
| **Theoretical framework** | | |
| 9. Methodological orientation and theory | What methodological orientation was stated to underpin the study? (e.g. grounded theory, discourse analysis, ethnography, phenomenology, content analysis) | The study is a realist evaluation (Pawson and Tilley, 1997). |
| **Participant selection** | | |
| 10. Sampling | How were participants selected? (e.g. purposive, convenience, consecutive, snowball) | A purposive sample of 6 intervention sites were recruited (they varied in terms of population size, rural/urban, and socio economic profile). The researchers contacted the managers of the health visiting programme in the six intervention sites and asked for assistance in recruiting health visitors for the focus groups. 2-4 days of observations were planned based on the calendars of the health visitors, and families for interviews were recruited directly during home visits. |
| 11. Method of approach | How were participants approached? (e.g. face to face, telephone, mail, e-mail) | Mothers were asked face to face after a home visit if we could contact them by telephone to tell them more about the study. Health visitors had prior to the home visit informed mothers that AKG would attend the visit.  Health visitors were approached through their managers. |
| 12. Sample size | How many participants were in the study? | 16 mothers  34 health visitors |
| 13. Non-participation | How many people refused to participate or dropped out? Reasons? | No one directly refused to participate, but we were not able to reach six mothers who face-to-face had agreed to be contacted by telephone. They did not return our voice mail and text messages. |
| **Setting** | | |
| 14. Setting of data collection | Where was the data collected? (e.g. home, clinic, workplace) | Focus groups with health visitors took place at their offices.  Interviews with mothers were conducted in their homes, via Zoom or by telephone, depending on the preferences of the mother. |
| 15. Presence of non-participants | Was anyone else present besides the participants and researchers? | In some cases the father was also present (usually taking care of the baby while we interviewed the mother). |
| 16. Description of sample | What are the important characteristics of the sample? (e.g. demographic data, date) | The only information collected about the health visitors were years of working experience, whether or not the participated in the training and if they were IBCLC certified (breastfeeding counsellors).  Regarding the mothers we collected the following demographic data: age, number of children, occupation prior to maternity leave, educational attainment, whether or not the lived with the father and breastfeeding status. |
| **Data collection** | | |
| 17. Interview guide | Were questions, prompts, guides provided by the authors? Was it pilot tested? | Observation and interview guides were developed and revised during the data collection process, following realist methodology. The guides were discussed extensively in the research group. |
| 18. Repeat interviews | Were repeat interviews carried out? If yes, how many? | No repeat focus group sessions/interviews were required |
| 19. Audio/visual recording | Did the research use audio or visual recording to collect the data? | Interviews and focus group sessions were audio-recorded |
| 20. Field notes | Were field notes made during and/or after the interview or focus group? | Yes, mainly afterwards. |
| 21. Duration | What was the duration of the interviews or focus group? | Focus group duration was app. 2 hours pr. site.  Interviews with mothers lasted app. 1 hour. |
| 22. Data saturation | Was data saturation discussed? | In realist methodology data saturation is not necessarily relevant, as even single cases are considered relevant. However, we did experience data saturation as described in qualitative methodology. |
| 23. Transcripts returned | Were transcripts returned to participants for comment and/or correction? | Transcripts were not returned to participants |
| **Domain 3: analysis and findings** | | |
| **Data analysis** | | |
| 24. Number of data coders | How many data coders coded the data? | AKG coded data, and SVF and UC coded a selection of interviews and results were compared and disagreement discussed. IN provided feedback on the coding. |
| 25. Description of the coding tree | Did authors provide a description of the coding tree? | No, but the coding process is extensively described in Methods section following realist methodology. |
| 26. Derivation of themes | Were themes identified in advance or derived from the data? | Themes were derived from the data |
| 27. Software | What software, if applicable, was used to manage the data? | NVivo 14 |
| 28. Participant checking | Did participants provide feedback on the findings? | No |
| **Reporting** | | |
| 29. Quotations presented | Were participant quotations presented to illustrate the themes/findings? Was each quotation identified? (e.g. participant number) | Quotations have been presented throughout the results section |
| 30. Data and findings consistent | Was there consistency between the data presented and the findings? | We have strived to report the study findings in a clear, consistent manner in order to accurately reflect the data that have been collected  Yes  Yes, minor themes are also included. |
| 31. Clarity of major themes | Were major themes clearly presented in the findings? |
| 32. Clarity of minor themes | Is there a description of diverse cases or discussion of minor themes? |
